# Supplementary material for: Use of intranasal rescue therapy for seizure clusters in students with epilepsy: Nurses’ knowledge, perceptions, and practice
Source: PubMed Central journal article supplement — Epilepsy Behav Rep. 2023 Apr 27;22:100604. doi: 10.1016/j.ebr.2023.100604 (PMC10337358; doi:10.1016/j.ebr.2023.100604), 2023-04-27
Supplement: mmc1.pdf [file mmc1.pdf]

## Supplementary Material

### Use of Intranasal Rescue Therapy for Seizure Clusters in Students With Epilepsy: Nurses' Knowledge, Perceptions, and Practice

**Authors:** Nancy Santilli, PNP, MN<sup>a</sup>; Sandra Dewar, APRN, PhD<sup>b</sup>; Cynthia Guerra, MBA<sup>c</sup>;

Sunita N. Misra, MD, PhD<sup>c</sup>; Adrian L. Rabinowicz, MD<sup>c</sup>; Enrique Carrazana, MD<sup>c,d</sup>

**Supplementary Table 1. Who Did You or Will You Train on the Use of Intranasal Diazepam?**

| <b>Answer</b>        | <b>Response Rate, n (%)</b> |
|----------------------|-----------------------------|
|                      | <b>n=88</b>                 |
| School nurses        | 55 (62.5)                   |
| Teachers             | 54 (61.4)                   |
| School aides         | 50 (56.8)                   |
| Administration staff | 46 (52.3)                   |
| Coaches              | 27 (30.7)                   |
| Other                | 17 (19.3)                   |

**Supplementary Table 2. Of All the Times a Student Required Intranasal Diazepam, How Often Did You Administer It to the Student?**

| <b>Answer</b>    | <b>Response Rate, n (%)<sup>a</sup></b> |
|------------------|-----------------------------------------|
|                  | <b>n=43</b>                             |
| All of the time  | 28 (65.1)                               |
| 75% of the time  | 0 (0)                                   |
| 50% of the time  | 4 (9.3)                                 |
| 25% of the time  | 3 (7.0)                                 |
| ≤24% of the time | 8 (18.6)                                |

<sup>a</sup>“N/A” responses were excluded from tabulation.

**Supplementary Table 3. If the Student Would Be Allowed to Participate in Off School Premises or Extracurricular Activities, Who Would Be Required to Carry Intranasal Diazepam for the Student?**

| <b>Answer</b>   | <b>Response Rate, n (%)</b> |
|-----------------|-----------------------------|
|                 | <b>n=190</b>                |
| Nurse           | 40 (21.1)                   |
| Parent/guardian | 21 (11.1)                   |
| Teacher/coach   | 90 (47.4)                   |
| Other           | 39 (20.5)                   |
